# Supplementary material for: Metabolite Changes in Orange Dead Leaf Butterfly Kallima inachus during Ontogeny and Diapause
Source: MDPI journal article supplement (doi:10.3390/metabo12090804), 2022-08-27
Supplement: s1 [file s1]

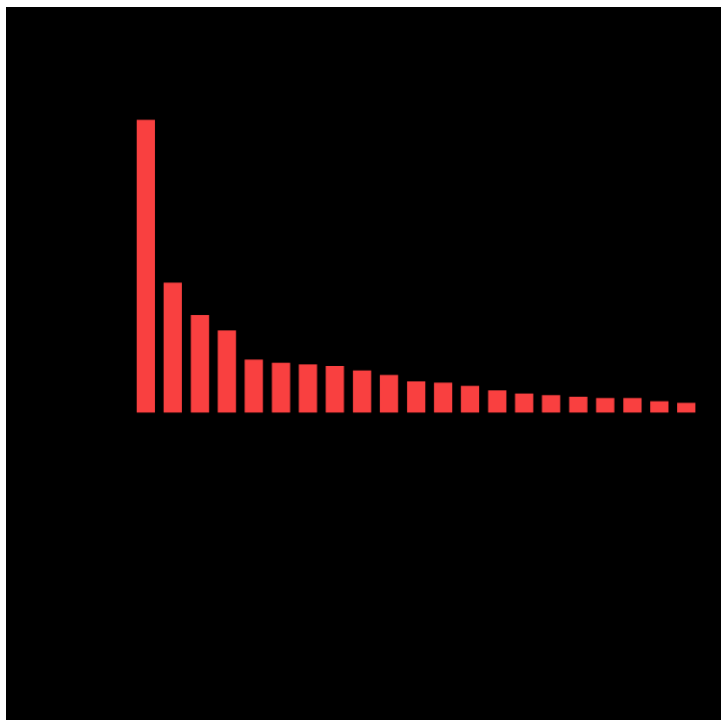

**Figure S1.** The top 20 largest metabolic secondary categories of all identified metabolites. The Y-axis represents the number of metabolites.
